# Supplementary material for: PI/TiC/TiO2 with Z-scheme heterostructure for the photocatalytic degradation of organic dyes
Source: Royal Society of Chemistry journal article supplement (doi:10.1039/d3nj04801b), 2023-01-01
Supplement: d3nj04801b1.pdf [file d3nj04801b1.pdf]

## Supplementary Information

### PI/TiC/TiO<sub>2</sub> with Z-scheme heterostructure for photocatalytic degradation of organic dyes

Taoming Yu <sup>a</sup>, Li Liu<sup>a</sup>, Yuehui Wang <sup>a</sup>, Shiwen Zhang <sup>a</sup>, Lili Li <sup>a,\*</sup>, Ce Liang<sup>a,\*</sup>

<sup>a</sup> Key Laboratory of Automobile Materials, Ministry of Education, and College of Materials

Science and Engineering, Jilin University, Changchun 130022, China.

\*Corresponding author.

E-mail address: lilyllee@jlu.edu.cn (Lili Li)

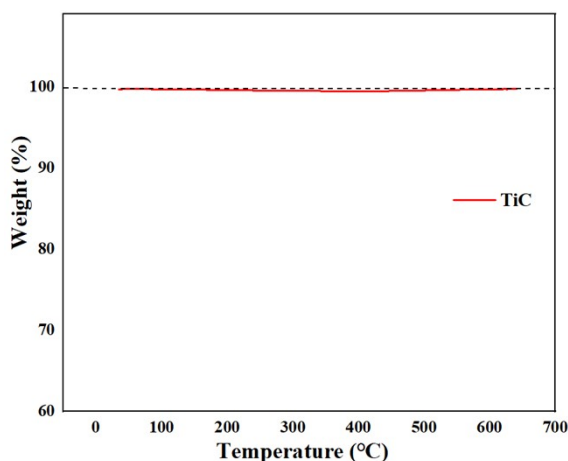

Fig.S1 TGA curves of TiC

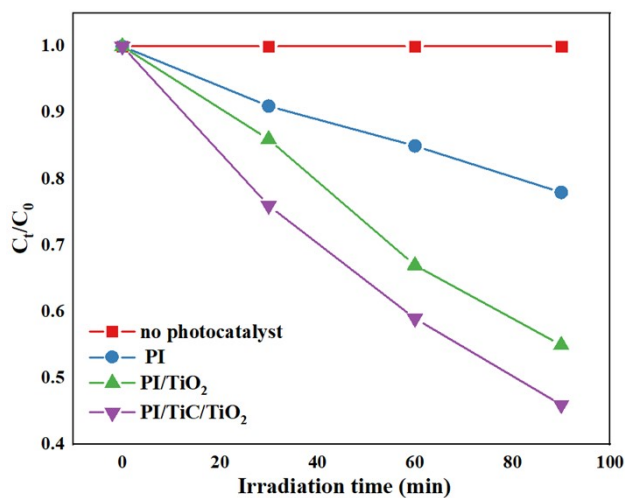

Fig.S2 Photocatalytic degradation of amoxicillin by PI, PI/TiO<sub>2</sub> and PI/TiC/TiO<sub>2</sub>.

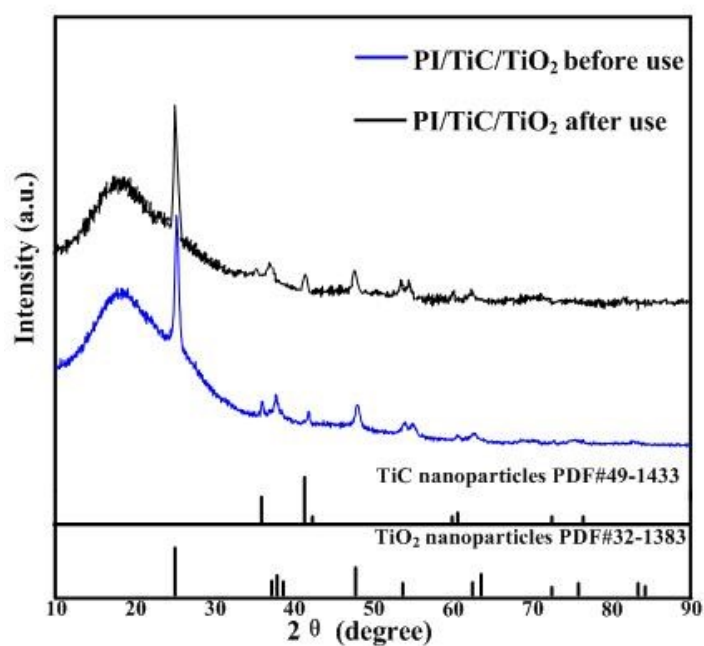

**Fig.S3** XRD patterns of PI/TiC/TiO<sub>2</sub> before and after cyclic degradation.

**Table S1** Reaction kinetic parameters for different photocatalysts. [Reaction conditions: Initial concentration = 12 mg/L, photocatalyst = 0.2 g, natural pH, t = 90 min, simulated sunlight irradiation]

| Samples                 | Dyes | $k_{app}(\text{min}^{-1})$ | $R^2$ |
|-------------------------|------|----------------------------|-------|
| PI                      | RhB  | 0.0026                     | 0.99  |
|                         | MB   | 0.0024                     | 0.98  |
|                         | MO   | 0.0013                     | 0.99  |
|                         | CR   | 0.0017                     | 0.99  |
| PI/TiO <sub>2</sub>     | RhB  | 0.0044                     | 0.98  |
|                         | MB   | 0.0037                     | 0.99  |
|                         | MO   | 0.0020                     | 0.99  |
|                         | CR   | 0.0027                     | 0.99  |
| PI/TiC/TiO <sub>2</sub> | RhB  | 0.0104                     | 0.98  |
|                         | MB   | 0.0092                     | 0.99  |
|                         | MO   | 0.0039                     | 0.99  |

---

CR

0.0065

0.99

---
